# Supplementary material for: The relationship between the Functional Movement Screen and the Y Balance Test in youth footballers
Source: PeerJ. 2022 Aug 30;10:e13906. doi: 10.7717/peerj.13906 (PMC9438769; doi:10.7717/peerj.13906)
Supplement: Supplemental Information 1 [file peerj-10-13906-s001.xlsx]

## Sheet: Arkusz1
Age	Weight	Height	BMI	Years of training	FMS Total Score	FMS Move	FMS FLEX	FMS Stabil	Y Anterior Right	Y Anterior Left	Y Posterolateral Right	Y Posterolateral Left	Y Posteromedial Right	Y Posteromedial Left	Y Anterior Average	Y Posterolateral Average	Y Posteromedial Average	Y Total Score
13	42.6	156.6	17.3711	4	17	6	6	5	73.251	80.2083	116.461	120.208	116.049	110.417	76.7081	118.323	113.251	102.761
13	50.9	163	19.1577	4	16	5	6	5	71.9512	69.9187	97.7642	110.976	99.187	94.7154	70.935	104.37	96.9512	90.752
13	63.7	179.8	19.7043	4	17	6	6	5	76.6839	70.4663	110.19	107.427	103.282	103.972	73.5751	108.808	103.627	95.3368
13	57.6	179.4	17.8969	4	18	8	5	5	70.6597	70.8772	105.035	109.298	100.694	104.737	70.7679	107.155	102.705	93.5428
13	48.1	167	17.2469	4	17	7	5	5	73.9464	77.3946	122.605	124.521	113.793	111.494	75.6705	123.563	112.644	103.959
13	46.8	162.5	17.7231	4	14	5	5	4	74.6988	79.9603	119.679	117.262	117.871	117.262	77.3453	118.463	117.565	104.458
13	47.1	159	18.6306	4	18	8	6	4	68.6747	71.9192	112.45	109.091	106.827	101.01	70.292	110.775	103.927	94.9983
13	51.6	169.8	17.8968	4	16	7	5	4	72.6592	68.9139	104.869	101.124	100.562	110.487	70.7865	102.996	105.524	93.1024
13	52.8	169.5	18.3778	4	12	6	5	1	57.7519	70.6827	105.426	108.032	103.682	107.028	64.1026	106.706	105.325	92.0447
13	46.2	154.6	19.3296	4	12	4	4	4	72.0884	65.2778	105.422	95.8333	102.209	97.8175	68.6627	100.599	100	89.7538
13	32.8	151.9	14.2154	4	18	8	6	4	74.0506	67.0833	113.08	113.958	105.907	108.333	70.5451	113.522	107.128	97.065
13	50.3	168.5	17.7161	4	14	5	5	4	58.5087	62.2222	95.7918	98.8889	102.99	101.296	60.3624	97.3378	102.145	86.6149
13	46.7	156	19.1897	4	12	5	3	4	62.8514	63.6905	100.803	105.159	107.631	104.762	63.2735	102.994	106.188	90.8184
13	41.7	157	16.9175	4	11	2	4	5	68.93	69.7154	109.259	107.114	109.671	104.268	69.3252	108.18	106.953	94.8194
13	49.3	168.4	17.3845	4	17	7	4	6	64.0071	62.9433	103.369	102.305	94.5035	79.7872	63.4752	102.837	87.1454	84.4858
13	50.1	156.8	20.3773	4	14	6	4	4	68.9583	64.9789	98.3333	93.6709	91.6667	89.4515	66.9811	96.0168	90.566	84.5213
13	45.3	160	17.6953	4	19	8	6	5	70.6349	74.1617	112.698	107.89	105.754	108.481	72.4036	110.287	107.122	96.604
13	46.4	159.9	18.1477	4	16	8	5	3	78.1065	78.373	107.89	102.381	101.775	105.754	78.2394	105.143	103.759	95.7138
13	40.9	154.3	17.1787	4	14	5	5	4	65.4321	56.4583	111.317	94.7917	110.288	92.0833	60.9731	103.106	101.242	88.4403
13	54.6	172	18.4559	4	14	6	5	3	66.8519	60.989	82.4074	90.293	88.7037	85.1648	63.9042	86.372	86.9245	79.0669
13	49.7	155	20.6868	4	18	7	6	5	69.2308	69.4093	110.256	111.181	106.197	110.127	69.3206	110.722	108.174	96.0722
13	33.9	147.6	15.5606	4	17	7	6	4	84.5238	83.5714	134.524	131.667	124.286	124.286	84.0476	133.095	124.286	113.81
13	39.7	146.5	18.4976	4	14	6	4	4	55.3419	63.6752	105.556	103.846	102.778	105.983	59.5085	104.701	104.38	89.5299
13	47.1	172	15.9208	4	17	8	5	4	62.1993	65.2921	103.265	103.78	98.2818	100.515	63.7457	103.522	99.3986	88.8889
13	52.8	173.5	17.5402	4	18	8	6	4	72.807	67.3401	107.018	99.8316	107.895	92.4242	70.0172	103.351	100	91.1226
13	54.4	175.9	17.582	4	13	6	3	4	62.4113	69.5035	104.61	92.0213	108.333	77.4823	65.9574	98.3156	92.9078	85.727
13	61.9	177.8	19.5807	4	15	5	5	5	50	59.0909	76.431	91.0774	87.037	89.5623	54.5455	83.7542	88.2997	75.5331
13	37.2	157.5	14.9962	4	16	7	5	4	73.5294	69.0196	105.294	104.314	104.314	106.275	71.2745	104.804	105.294	93.7908
17	75.9	183.3	22.59	8	17	8	5	4	65.7986	71.0526	106.076	110.702	100	104.386	68.4119	108.377	102.182	92.9901
17	71.3	179.4	22.1536	8	15	5	5	5	57.2165	60.4811	102.577	107.045	97.7663	99.3127	58.8488	104.811	98.5395	87.3998
17	68.9	186	19.9156	8	15	5	5	5	69.0236	69.3603	94.6128	99.6633	91.5825	91.7508	69.1919	97.138	91.6667	85.9989
17	67.6	171.5	22.9836	8	19	8	6	5	72.7778	73.221	113.704	113.67	112.222	114.419	72.9981	113.687	113.315	100
17	74.6	181	22.771	8	12	3	4	5	68.1667	69.8333	103.333	98.3333	104.667	101.667	69	100.833	103.167	91
17	64.7	178.3	20.3517	8	10	5	5	0	68.7719	73.6842	100.526	100.877	94.5614	94.7368	71.2281	100.702	94.6491	88.8596
17	71.5	179.6	22.1663	8	13	5	3	5	52.2569	52.4561	102.257	84.2105	95.3125	88.4211	52.356	93.281	91.8848	79.1739
17	71.5	182.3	21.5146	8	16	7	4	5	62.807	73.5088	111.579	109.649	114.737	110	68.1579	110.614	112.368	97.0468
17	63	172.6	21.1475	8	14	5	4	5	67.5926	65.1852	111.852	105	99.0741	95.3704	66.3889	108.426	97.2222	90.679
17	70.4	178.8	22.021	8	15	6	5	4	58.8889	61.1111	112.963	114.259	109.074	112.407	60	113.611	110.741	94.784
17	67.4	178.5	21.1536	8	11	6	3	2	65.5914	68.1004	99.1039	101.075	99.8208	109.677	66.8459	100.09	104.749	90.5615
17	68.7	177.2	21.8791	8	13	5	6	2	68.4028	70.4861	106.771	104.861	104.34	100.347	69.4444	105.816	102.344	92.5347
17	66	179	20.5986	8	20	8	6	6	80.0687	78.866	113.574	112.887	114.605	110.825	79.4674	113.23	112.715	101.804
17	75.1	187.5	21.3618	8	12	5	5	2	58.7379	60.1942	95.1456	87.5405	91.7476	92.7184	59.466	91.343	92.233	81.014
17	68.1	178	21.4935	8	17	6	6	5	64.3333	64.1667	107.333	113.333	103.333	111.333	64.25	110.333	107.333	93.9722
17	64.4	178.3	20.2574	8	11	6	3	2	68.9236	63.6842	103.646	106.842	101.91	100.351	66.3176	105.236	101.134	90.8959
17	74.7	187	21.3618	8	12	4	3	5	54.8333	64.9832	98	107.071	94.1667	90.9091	59.8827	102.513	92.5461	84.9805
16	60.4	168.7	21.223	7	16	6	5	5	64.5833	62.3106	114.583	103.22	106.629	101.894	63.447	108.902	104.261	92.2033
16	51.9	170.4	17.8743	7	14	5	5	4	66.6667	68.2131	101.546	97.4227	93.8144	95.189	67.4399	99.4845	94.5017	87.142
17	61.3	176.6	19.6553	8	13	6	4	3	72.4638	65.7706	114.312	98.2079	97.8261	81.0036	69.0991	106.216	89.3694	88.2282
17	62.9	168.5	22.1539	8	16	6	5	5	66.092	74.9042	116.858	115.9	115.326	112.069	70.4981	116.379	113.697	100.192
16	59	165.6	21.5145	7	17	6	6	5	69.8864	67.9924	107.197	111.364	105.492	107.386	68.9394	109.28	106.439	94.8864
16	76.6	181	23.3815	7	11	3	4	4	63.7457	67.354	93.4708	93.9863	103.093	93.4708	65.5498	93.7285	98.2818	85.8534
16	62.7	185.5	18.2213	7	15	6	4	5	69.0236	68.5185	100.337	87.7104	85.1852	85.0168	68.771	94.0236	85.101	82.6319
16	58	175.8	18.7668	7	17	7	5	5	70.5387	67.3401	102.862	106.734	97.3064	99.3266	68.9394	104.798	98.3165	90.6846
16	68.7	185.5	19.965	7	18	9	5	4	67.6568	70.6271	94.7195	96.2046	104.125	102.475	69.1419	95.462	103.3	89.3014
16	87	179.3	27.0619	7	18	7	5	6	56.1404	54.386	98.9474	101.93	82.4561	85.0877	55.2632	100.439	83.7719	79.8246
16	73.1	186.5	21.0165	7	16	5	6	5	66.1667	65	103	98.1667	98.5	96.1667	65.5833	100.583	97.3333	87.8333
16	48.9	164.6	18.0488	7	19	8	6	5	75.2941	77.0588	115.882	110.196	109.412	110.392	76.1765	113.039	109.902	99.7059
16	61	174.7	19.9868	7	17	6	6	5	59.0426	64.7163	104.433	102.837	97.5177	100	61.8794	103.635	98.7589	88.091
16	72	178.5	22.5973	7	15	5	4	6	71.0326	70.8333	102.355	104.167	106.341	102.717	70.933	103.261	104.529	92.9076
16	62.3	182.8	18.6439	7	16	5	6	5	61.3402	62.543	95.0172	109.794	90.378	93.9863	61.9416	102.405	92.1821	85.5097
16	61.6	173.2	20.5345	7	16	8	3	5	74.359	77.8986	117.399	115.217	109.341	109.239	76.1384	116.302	109.29	100.577
16	48.1	173.4	15.9973	7	16	6	5	5	75.0916	76.1905	110.073	109.89	117.949	111.355	75.641	109.982	114.652	100.092
16	67	178.2	21.0989	7	15	5	5	5	62.766	71.3262	95.5674	103.226	95.2128	99.8208	67.0232	99.3761	97.5045	87.9679
16	76.2	181	23.2594	7	17	7	6	4	73.6111	71.9931	110.938	115.464	115.799	111.512	72.7979	113.212	113.644	99.8849
16	60.9	173.8	20.1613	7	20	8	6	6	67.2043	69.7133	105.376	101.613	96.9534	100	68.4588	103.495	98.4767	90.1434
16	57.1	183	17.0504	7	21	9	6	6	74.4681	79.078	114.539	112.766	118.972	115.248	76.773	113.652	117.11	102.512
15	62.4	1.79	19.475	6	10	4	2	4	72.037	73.3333	104.815	113.889	108.889	107.407	72.6852	109.352	108.148	96.7284
15	73.1	1.78	23.0716	6	13	6	2	5	59.7518	60.2837	102.128	100.709	96.4539	97.8723	60.0177	101.418	97.1631	86.1998
15	42	1.55	17.4818	6	17	8	5	4	65.098	66.4706	101.373	103.725	99.4118	102.549	65.7843	102.549	100.98	89.7712
15	46.4	1.66	16.8384	6	11	6	2	3	76.3736	75.0916	103.114	104.579	107.692	110.256	75.7326	103.846	108.974	96.1844
15	55.4	1.8	17.0988	6	13	7	4	2	71.4286	73.8095	118.027	117.177	126.871	108.844	72.619	117.602	117.857	102.693
15	88.3	1.85	25.7999	6	12	4	3	5	54.6875	55.7292	79.1667	96.1806	94.6181	93.2292	55.2083	87.6736	93.9236	78.9352
15	61.1	1.72	20.6531	6	12	5	3	4	65.3257	66.6667	97.1264	105.364	95.4023	99.2337	65.9962	101.245	97.318	88.1865
15	66.8	1.74	22.0637	6	13	4	4	5	60.3704	61.2963	103.704	103.148	106.852	105.741	60.8333	103.426	106.296	90.1852
15	60.6	1.85	17.7064	6	11	5	3	3	67.354	64.7766	106.873	103.78	100.859	103.952	66.0653	105.326	102.405	91.2658
15	68.1	1.79	21.254	6	12	5	4	3	72.9592	72.619	107.823	106.122	104.422	92.517	72.7891	106.973	98.4694	92.7438
15	67	1.8	20.679	6	14	6	3	5	57.5269	56.0932	96.9534	93.5484	102.867	106.093	56.81	95.2509	104.48	85.5137
15	59.1	1.68	20.9396	6	15	6	4	5	61.6487	58.3333	101.792	95.7447	99.8208	93.9716	59.9822	98.7522	96.8806	85.205
15	58.9	1.82	17.7817	6	13	6	3	4	62.6263	64.3098	108.923	110.774	105.051	101.347	63.468	109.848	103.199	92.1717
15	58.6	1.7	20.2768	6	15	6	4	5	64.8551	62.3188	109.964	109.964	105.435	105.072	63.587	109.964	105.254	92.9348
15	69.1	1.75	22.5633	6	15	5	5	5	59.8148	61.7978	113.704	116.292	103.889	119.101	60.8007	114.991	111.453	95.748
15	65.5	1.8	20.216	6	15	7	3	5	66.3082	69.7133	116.129	113.799	120.43	113.082	68.0108	114.964	116.756	99.9104
15	64.8	1.75	21.1592	6	14	5	5	4	65.614	60.2431	110.175	113.542	117.193	122.917	62.9145	111.867	120.07	98.2839
15	68.2	1.78	21.5251	6	13	5	3	5	62.3188	66.4875	114.674	126.703	111.775	112.903	64.4144	120.721	112.342	99.1592
16	86.7	1.96	22.5687	7	14	6	3	5	72.0635	70.1923	102.381	100.641	95.873	101.923	71.1324	101.515	98.8836	90.5104
16	68.8	1.77	21.9605	7	15	6	4	5	64.8746	68.1004	100.358	105.556	105.197	103.763	66.4875	102.957	104.48	91.3082
16	70	1.8	21.6049	7	16	8	4	4	63.4409	60.2151	99.4624	91.7563	102.33	106.631	61.828	95.6093	104.48	87.3059
16	65.7	1.73	21.952	7	15	5	5	5	65.3704	66.4815	110.926	108.889	106.296	97.037	65.9259	109.907	101.667	92.5
16	65.5	1.76	21.1454	7	15	6	4	5	61.4695	63.6201	107.348	106.81	93.9068	100	62.5448	107.079	96.9534	88.859
16	70.6	1.77	22.535	7	14	5	4	5	67.9487	65.5678	115.751	117.216	120.513	119.414	66.7582	116.484	119.963	101.068
16	73.2	1.83	21.8579	7	15	6	4	5	63.5	64.6465	104.333	105.724	100.667	100.168	64.0704	105.025	100.419	89.8381
16	59.5	1.76	19.2084	7	18	7	6	5	72.8723	72.695	109.574	111.17	112.411	110.638	72.7837	110.372	111.525	98.227
16	76.7	1.82	23.1554	7	16	6	6	4	75.5102	71.7687	109.694	107.313	111.735	111.054	73.6395	108.503	111.395	97.8458
16	65.1	1.73	21.7515	7	18	8	5	5	78.2609	76.4493	108.877	111.957	119.203	127.174	77.3551	110.417	123.188	103.653
16	61.6	1.7	21.3149	7	19	8	6	5	64.5594	68.9394	118.391	114.015	105.172	106.061	66.7619	116.19	105.619	96.1905
16	72	1.8	22.2222	7	14	6	5	3	72.4561	74.0351	110.702	116.14	101.404	106.667	73.2456	113.421	104.035	96.9006
16	61.5	1.74	20.3131	7	14	6	3	5	63.4409	57.5269	111.111	148.208	99.6416	103.584	60.4839	129.659	101.613	97.2521
16	67.2	1.73	22.4531	7	16	6	5	5	78.6822	81.7829	129.07	128.682	125.581	132.946	80.2326	128.876	129.264	112.791
16	70	1.74	23.1206	7	13	5	3	5	58.8768	64.4928	107.79	108.696	106.159	115.217	61.6848	108.243	110.688	93.5386
16	73.6	1.86	21.2741	7	17	7	6	4	68.8552	68.3502	95.1178	104.882	98.4848	104.04	68.6027	100	101.263	89.9551
16	65.1	1.8	20.0926	7	16	7	4	5	74.386	72.9825	113.684	115.789	113.684	115.789	73.6842	114.737	114.737	101.053
16	65	1.71	22.2291	7	16	7	5	4	63.6525	63.6525	113.298	104.965	110.106	109.043	63.6525	109.131	109.574	94.1194
16	62.3	1.7	21.5571	7	16	8	3	5	61.3027	67.433	111.494	110.728	107.663	107.471	64.3678	111.111	107.567	94.3487
16	73.7	1.85	21.534	7	16	6	5	5	56.6667	58.9474	112.456	108.947	105.263	107.719	57.807	110.702	106.491	91.6667
16	56.5	1.72	19.0982	7	18	8	6	4	68.1319	64.4444	118.864	119.074	111.355	111.481	66.2983	118.969	111.418	98.895
16	64.2	1.78	20.2626	7	19	9	5	5	72.807	71.5789	116.491	115.614	114.035	110.526	72.193	116.053	112.281	100.175
15	78.1	177.5	24.9	7	14	6	4	4	74.4565	72.2826	102.717	103.442	98.5507	107.428	73.3696	103.08	102.989	93.1461
15	43.3	160.5	16.8	7	18	8	6	4	71.6667	78.5714	111.706	106.746	101.19	108.73	75.119	109.226	104.96	96.4352
14	53.2	167.5	19	6	18	7	6	5	71.8391	69.7318	132.95	118.391	124.904	126.054	70.7854	125.67	125.479	107.312
15	78.3	176.5	25.18	7	15	7	5	3	74.6454	73.227	123.759	107.801	107.979	111.879	73.9362	115.78	109.929	99.8818
14	37.7	155	15.4	6	20	8	6	6	76.749	77.8455	111.111	111.179	121.399	115.447	77.3006	111.145	118.405	102.284
14	57.1	164	21.19	6	14	5	5	4	66.6667	68.6275	115.675	109.412	112.302	109.804	67.6529	112.525	111.045	97.0743
13	45	152	19.48	5	15	7	5	3	73.2068	72.5	112.236	111.042	115.401	106.458	72.8512	111.635	110.901	98.4626
13	38.2	155	15.82	5	20	8	6	6	71.2851	71.2851	95.1807	90.7631	99.5984	92.9719	71.2851	92.9719	96.2851	86.8474
13	43.9	154	18.13	6	16	7	5	4	68.75	70.2083	105	110.833	117.5	114.583	69.4792	107.917	116.042	97.8125
13	50.8	164	18.59	5	18	6	6	6	71.2644	77.2031	103.448	102.299	105.747	102.107	74.2337	102.874	103.927	93.6782
13	46.8	159	18.2	5	20	9	6	5	75.3968	74.6032	102.381	114.286	99.2063	97.2222	75	108.333	98.2143	93.8492
13	40.3	155	16.65	6	19	8	6	5	75.625	68.3333	115	107.917	101.042	95	71.9792	111.458	98.0208	93.8194
13	38.4	153	16.23	6	19	8	5	6	91.1392	82.2785	118.987	118.565	128.692	120.675	86.7089	118.776	124.684	110.056
13	48.6	163	18.07	5	15	7	4	4	77.1084	70.4819	93.5743	96.7871	120.482	100.201	73.7952	95.1807	110.341	93.1058
13	51.4	166	18.51	6	12	5	4	3	77.5194	70.9302	103.488	107.364	108.527	112.791	74.2248	105.426	110.659	96.77
13	59.2	171	20.18	5	17	6	5	6	64.4444	69.6296	114.815	107.407	95.1852	99.2593	67.037	111.111	97.2222	91.7901
13	37.2	146.5	17.36	5	17	7	4	6	76.0684	78.4188	101.282	100.641	99.5726	107.906	77.2436	100.962	103.739	93.9815
13	29.8	144	14.47	5	20	9	6	5	73.8739	79.5556	102.252	91.5556	108.108	108.444	76.7338	96.868	108.277	93.9597
14	56.7	170	19.38	7	21	9	6	6	72.8938	72.1612	111.722	109.158	109.524	107.692	72.5275	110.44	108.608	97.1917
14	49.7	169	17.51	6	19	8	5	6	73.3333	77.037	111.481	103.704	101.481	107.778	75.1852	107.593	104.63	95.8025
14	51.8	163	19.57	7	20	9	5	6	80.3922	70.6349	104.706	117.063	112.157	118.254	75.5424	110.848	115.187	100.526
14	57.8	176	18.72	7	20	9	6	5	70.3704	75.1852	125.926	140.741	111.852	117.407	72.7778	133.333	114.63	106.914
14	68.6	177	22.02	7	19	8	6	5	75.4386	75.8865	95.4386	94.6809	100.351	96.8085	75.6614	95.0617	98.5891	89.7707
11	47.5	146	22.05	3	14	6	4	4	68.1818	65.7895	108.225	110.965	103.896	102.851	66.9935	109.586	103.377	93.3188
12	54	159	21.36	4	13	5	5	3	70.9302	65.1163	98.062	101.163	109.69	98.8372	68.0233	99.6124	104.264	90.6331
11	49.9	155	20.81	3	18	7	5	6	60.9756	64.2276	95.5285	101.22	89.4309	102.439	62.6016	98.374	95.935	85.6369
12	54.1	157	21.91	4	15	6	6	3	62.8352	62.069	101.916	104.598	95.4023	93.1034	62.4521	103.257	94.2529	86.6539
12	52	148	23.74	4	18	7	6	5	75.5274	72.1519	107.595	110.549	105.907	108.861	73.8397	109.072	107.384	96.7651
12	37.3	150	16.44	4	18	7	5	6	78.2051	76.4957	116.239	137.179	114.957	110.256	77.3504	126.709	112.607	105.556
12	43.4	159	17.01	4	18	9	5	4	60.6426	66.6667	100.803	117.857	103.414	113.492	63.6727	109.381	108.483	93.8456
12	41.6	152	17.75	4	17	7	6	4	63.786	63.8211	101.235	102.846	102.058	105.894	63.8037	102.045	103.988	89.9455
12	52.4	159	20.57	4	18	8	6	4	65.625	64.1667	117.292	100.833	105	96.25	64.8958	109.062	100.625	91.5278
13	58	164	21.56	4	17	6	6	5	69.7318	62.8352	116.858	108.429	107.854	111.494	66.2835	112.644	109.674	96.2005
11	36.5	148.5	16.44	3	17	7	4	6	73.1982	74.0991	110.811	119.369	125.676	126.351	73.6486	115.09	126.014	104.917
11	38.5	149	17.12	3	19	8	5	6	73.2068	72.9167	117.511	118.333	113.08	117.708	73.0608	117.925	115.409	102.131
12	41	156	16.85	4	17	8	5	4	59.5238	62.3016	109.921	105.952	106.746	103.968	60.9127	107.937	105.357	91.4021
12	36	149	16.22	4	19	8	6	5	80	81.2757	108.333	117.284	122.708	107.407	80.6418	112.836	115.01	102.83
11	32.3	148	14.61	3	19	8	5	6	78.2051	76.6234	120.513	114.286	110.684	114.286	77.4194	117.419	112.473	102.437
12	37.4	159	14.64	4	18	8	5	5	67.8862	67.4797	102.033	109.756	93.9024	102.439	67.6829	105.894	98.1707	90.5827
12	35	146	16.42	4	17	8	5	4	72.5738	67.9325	109.705	104.641	104.219	104.641	70.2532	107.173	104.43	93.9522
12	31.9	148	14.61	4	19	8	6	5	66.2551	67.4897	99.177	103.292	102.058	106.584	66.8724	101.235	104.321	90.8093
12	35.5	148	15.98	4	19	8	5	6	74.2616	76.4957	133.333	128.632	133.755	132.906	75.3715	130.998	133.333	113.234
12	34.5	143	16.63	4	15	8	4	3	69.2884	73.4082	80.8989	87.6404	89.8876	94.0075	71.3483	84.2697	91.9476	82.5218
12	40.1	158	16.02	5	19	7	6	6	65.873	76.4706	108.333	97.2549	98.8095	103.137	71.2032	102.761	100.986	91.6502
12	36	138	18.9	5	17	8	4	5	76.7544	75	111.404	107.456	103.947	106.14	75.8772	109.43	105.044	96.7836
12	40.8	143	20.05	5	16	6	4	6	88	78.2222	123.111	114.667	108.889	104.444	83.1111	118.889	106.667	102.889
12	42.8	150.5	19.11	5	20	8	6	6	76.3713	76.7932	109.283	105.485	109.283	105.063	76.5823	107.384	107.173	97.0464
12	33.1	142	16.37	5	19	7	6	6	68.9498	67.3516	113.699	113.242	109.132	106.393	68.1507	113.47	107.763	96.4612
11	44.2	137	22.38	4	17	7	6	4	67.6056	70.892	111.737	111.033	108.451	111.268	69.2488	111.385	109.859	96.831
12	44.9	159.5	17.58	5	17	7	4	6	82.1705	67.2481	101.55	93.2171	92.2481	96.8992	74.7093	97.3837	94.5736	88.8889
12	36.3	151.5	15.79	5	18	8	6	4	74.6914	67.2917	109.259	101.25	112.757	106.25	71.0145	105.28	109.524	95.2726
12	35.2	144	16.88	5	15	6	5	4	72.2944	72.2944	103.463	102.814	102.165	102.597	72.2944	103.139	102.381	92.6046
12	37	152	16.01	5	20	8	6	6	71.8615	76.2821	103.247	95.5128	97.619	86.5385	74.086	99.3548	92.043	88.4946
12	43.4	153	18.37	5	14	5	5	4	66.4474	73.0263	110.965	108.553	118.86	114.912	69.7368	109.759	116.886	98.7939
9	26.3	125	16.64	2	17	8	5	4	69.7917	65.3646	108.333	93.4896	99.4792	99.4792	67.5781	100.911	99.4792	89.3229
9	36.9	142	18.35	2	18	9	5	4	66.1972	73.1481	98.5915	76.3889	90.1408	83.3333	69.697	87.4126	86.7133	81.2743
10	30.3	144.5	14.47	2	19	8	6	5	83.1111	79.1111	123.111	134.667	94.8889	111.111	81.1111	128.889	103	104.333
10	38	150.5	16.89	2	14	7	4	3	80.2083	75.4167	109.167	105.417	100	93.75	77.8125	107.292	96.875	93.9931
9	32	140	16.33	2	18	8	5	5	72.4638	71.0145	146.377	125.604	126.57	111.594	71.7391	135.99	119.082	108.937
9	38.1	144	18.33	2	12	5	4	3	66.2037	66.1972	99.0741	109.39	83.7963	92.0188	66.2005	104.196	87.8788	86.0917
10	46.2	147	21.29	2	14	7	4	3	70.2222	57.8947	104.889	94.2982	97.7778	91.6667	64.0177	99.5585	94.702	86.0927
10	30.2	143	14.67	2	19	9	5	5	76.8889	77.7778	125.333	121.556	117.333	112.889	77.3333	123.444	115.111	105.296
10	32.3	138	16.8	2	19	8	6	5	74.1784	73.2394	115.023	111.737	115.962	115.023	73.7089	113.38	115.493	100.861
10	39	149	17.57	4	14	5	5	4	76.8889	70.1754	119.556	107.018	130.667	116.667	73.5099	113.245	123.62	103.458
10	27.3	141	13.58	4	20	9	5	6	78.8288	71.5556	104.505	124.444	117.568	120.889	75.1678	114.541	119.239	102.983
10	30.5	140	15.31	4	18	8	5	5	65.9722	66.21	119.907	107.534	105.556	103.425	66.092	113.678	104.483	94.751
10	31.6	142	15.87	4	13	7	4	2	56.9444	56.338	85.1852	88.2629	75.9259	78.8732	56.6434	86.7133	77.3893	73.582
10	35.8	153	15.38	4	16	7	4	5	75.7576	76.0684	100.866	102.991	109.957	108.12	75.914	101.935	109.032	95.6272
10	32.3	144	15.43	3	14	6	4	4	70.6019	68.75	114.815	116.898	96.2963	106.944	69.6759	115.856	101.62	95.7176
10	27.3	135	14.81	3	15	6	4	5	61.7647	64.2157	118.627	119.608	101.961	109.314	62.9902	119.118	105.637	95.915
10	41.4	151	17.98	3	14	6	5	3	68.7764	65.5983	90.7173	102.564	88.1857	85.8974	67.1975	96.603	87.0488	83.6164
10	32.4	143	15.65	4	18	7	6	5	67.7928	63.5135	96.8468	100.901	92.7928	93.6937	65.6532	98.8739	93.2432	85.9234
10	42.6	153	17.94	4	19	9	5	5	63.2911	64.135	84.3882	94.0928	77.6371	77.2152	63.7131	89.2405	77.4262	76.7932
10	34.1	153	14.52	4	17	9	4	4	68.8596	72.5877	114.912	110.088	113.158	103.947	70.7237	112.5	108.553	97.2588
10	36.4	143	17.6	3	20	9	5	6	72	78.2222	109.778	120	107.111	114.222	75.1111	114.889	110.667	100.222
10	42.4	164	15.62	4	18	9	4	5	76.506	73.2143	106.024	109.524	116.867	109.524	74.8503	107.784	113.174	98.6028
10	37.7	142	18.85	4	16	6	5	5	62.963	68.0365	112.037	100.457	103.241	108.219	65.5172	106.207	105.747	92.4904
10	56.7	153	24.35	2	13	6	3	4	64.257	60.5691	82.9317	89.0244	84.3373	97.561	62.4242	85.9596	90.9091	79.7643
10	32	140	16.33	2	16	8	4	4	69.3333	64.8889	95.5556	87.5556	97.3333	92	67.1111	91.5556	94.6667	84.4444
10	34.7	150	15.56	2	17	7	6	4	81.1966	77.8481	120.085	118.143	102.564	129.114	79.5117	119.108	115.924	104.848
10	34.9	153	14.95	2	18	8	4	6	71.6667	71.25	92.9167	92.9167	79.5833	80.8333	71.4583	92.9167	80.2083	81.5278
10	49.3	154	20.93	2	11	6	3	2	59.9156	60.8974	86.0759	89.7436	95.3586	101.709	60.4034	87.8981	98.5138	82.2718
16	56.7	178	17.99	8	17	6	6	5	69.7595	69.7279	104.811	105.272	102.062	96.4286	69.7436	105.043	99.2308	91.339
16	46.6	168	16.65	8	18	8	5	5	76.8199	77.2031	113.985	112.835	111.877	100.383	77.0115	113.41	106.13	98.8506
16	60.8	176	19.69	8	20	8	6	6	67.9211	70.7885	106.81	114.516	108.781	113.978	69.3548	110.663	111.38	97.1326
17	63.6	180	19.75	9	19	8	5	6	68.4588	76.7025	124.731	118.996	112.545	119.355	72.5806	121.864	115.95	103.465
17	64.8	173	21.72	9	19	9	4	6	61.9048	67.7656	118.864	121.062	109.89	119.78	64.8352	119.963	114.835	99.8779
15	52.5	167	19	7	18	9	5	4	79.6296	74.8971	114.815	114.815	112.551	113.374	77.2634	114.815	112.963	101.68
14	63.1	177	20.11	6	18	7	6	5	74.2593	72.7106	112.407	108.791	108.889	112.088	73.4807	110.589	110.497	98.1891
16	49.4	173	16.37	8	19	9	5	5	79.8535	78.2051	111.355	113.553	115.385	110.806	79.0293	112.454	113.095	101.526
16	47.6	168	17.01	8	20	8	6	6	64.2045	61.9318	106.629	108.333	102.273	103.409	63.0682	107.481	102.841	91.1301
16	50.6	166	18.51	8	17	6	6	5	75.1938	68.0233	90.3101	76.7442	104.651	100.388	71.6085	83.5271	102.519	85.885
16	61.9	174	20.48	8	19	8	5	6	76.8939	77.6515	114.394	118.561	104.167	94.697	77.2727	116.477	99.4318	97.7273
16	53.3	166	19.23	8	19	9	4	6	65.098	63.5294	111.373	106.275	112.549	112.353	64.3137	108.824	112.451	95.1961
16	72.4	185	21.04	8	16	6	4	6	71.4035	66.8421	108.947	104.912	97.7193	97.5439	69.1228	106.93	97.6316	91.2281
15	72.2	194	19.13	7	19	9	5	5	76.5432	73.3333	106.019	110	103.086	105.152	74.9235	108.028	104.128	95.6932
16	52.5	176	17.11	8	17	9	4	4	80.4965	78.9007	114.716	111.525	109.397	111.702	79.6986	113.121	110.55	101.123
16	49.1	172	16.56	9	16	6	5	5	62.3656	63.7993	95.3405	96.9534	94.2652	98.9247	63.0824	96.147	96.595	85.2748
16	57.2	184	16.84	9	18	8	6	4	73.9583	72.9167	107.118	107.465	110.59	99.6528	73.4375	107.292	105.122	95.2836
16	61.1	180	18.83	9	18	7	6	5	73.2975	73.2975	97.3118	106.272	112.903	110.215	73.2975	101.792	111.559	95.5496
16	52.7	176	17.11	8	19	7	6	6	74.2593	73.2601	108.148	103.48	105.556	106.41	73.7569	105.801	105.985	95.1811
16	67.9	184.5	20.09	8	20	9	5	6	72.7431	66.1404	113.368	113.333	113.507	109.298	69.459	113.351	111.414	98.0745
11	28.4	140	14.29	3	16	7	5	4	82.1596	79.8122	129.812	124.883	109.155	121.596	80.9859	127.347	115.376	107.903
17	81.7	185	23.96	9	19	7	6	6	59.0278	62.3711	111.111	106.357	99.8264	93.8144	60.7081	108.722	96.8048	88.745
17	76.1	189	21.28	9	20	8	6	6	70.3704	73.064	105.724	110.438	101.347	101.684	71.7172	108.081	101.515	93.771
17	60.6	168	21.61	9	17	7	4	6	78.5714	79.9603	96.0317	113.492	93.8492	99.6032	79.2659	104.762	96.7262	93.5847
17	57	176	18.4	9	19	8	5	6	76.8116	74.7253	111.594	118.681	109.058	115.751	75.7741	115.118	112.386	101.093
17	68.8	178	21.78	9	17	7	4	6	56.9892	60.2151	97.6703	93.5484	90.681	94.9821	58.6022	95.6093	92.8315	82.3477
17	78	188	22.07	9	20	9	5	6	79.2929	77.7778	112.458	118.519	114.478	117.172	78.5354	115.488	115.825	103.283
17	75.2	180	23.15	9	17	7	4	6	62.724	60.2151	111.828	115.233	115.591	111.29	61.4695	113.53	113.441	96.147
16	51.5	174	17.18	8	20	8	6	6	72.9167	66.6667	125.189	125.281	128.03	124.157	69.774	125.235	126.083	107.031
17	65.4	171	22.23	9	18	7	5	6	61.6667	65	107.037	118.889	98.1481	103.704	63.3333	112.963	100.926	92.4074
16	52.8	174	17.51	9	17	7	5	5	79.1667	75.9058	119.384	113.587	116.123	107.428	77.5362	116.486	111.775	101.932
13	38.5	150	16.89	6	18	8	5	5	68.75	71.73	109.167	117.089	115	103.376	70.2306	113.103	109.224	97.5192
13	45.2	159	17.8	6	18	7	5	6	66.2551	69.1358	111.111	114.815	108.23	110.7	67.6955	112.963	109.465	96.7078
15	62.9	170	22	6	16	7	5	4	61.985	63.6704	105.993	107.491	124.719	111.798	62.8277	106.742	118.258	95.9426
13	45.5	162	17.1	5	20	8	6	6	68.4109	68.7984	105.814	105.233	105.426	106.589	68.6047	105.523	106.008	93.3786
13	38.1	148.5	17.3	5	19	9	6	4	79.9145	82.906	124.573	119.872	120.513	122.222	81.4103	122.222	121.368	108.333
13	46.7	157	19	5	18	9	5	4	71.5686	71.9608	107.647	108.627	110.784	110.588	71.7647	108.137	110.686	96.8627
13	39.7	150	17.3	5	20	8	6	6	86.7063	75.5952	122.222	124.405	117.063	125	81.1508	123.313	121.032	108.499
